# Supplementary material for: Hfq-bridged ternary complex is important for translation activation of rpoS by DsrA
Source: PubMed Central journal article supplement — Nucleic Acids Res. 2013 Apr 19;41(11):5938–48. doi: 10.1093/nar/gkt276 (PMC3675490; doi:10.1093/nar/gkt276), 2013-04-19
Supplement: supp_gkt276_nar-03217-c-2012-File009.pdf [file supp_gkt276_nar-03217-c-2012-File009.pdf]

**Table S1. Statistics of structures.**

|                                                         | AU <sub>6</sub> A•Hfq65•A <sub>7</sub>                                                                                                                              | Hfq65•A <sub>7</sub>   |
|---------------------------------------------------------|---------------------------------------------------------------------------------------------------------------------------------------------------------------------|------------------------|
| <b>Data collection</b>                                  |                                                                                                                                                                     |                        |
| Space group                                             | I 1 2 1                                                                                                                                                             | C 1 2 1                |
| Cell dimensions                                         |   |                        |
| <i>a, b, c</i> (Å)                                      | 60.59, 38.28, 84.52                                                                                                                                                 | 103.99, 40.71, 100.85  |
| $\alpha, \beta, \gamma$ (°)                             | 90.00, 90.00, 90.00                                                                                                                                                 | 90.00, 101.36, 90.00   |
| Resolution (Å)                                          | 30.3-1.80 (1.9-1.80) *                                                                                                                                              | 31.1-1.90 (2.03-1.90)* |
| <i>R</i> <sub>merge</sub> (%)                           | 5.7 (26.8)                                                                                                                                                          | 5.9 (10.5)             |
| <i>I</i> / $\sigma I$                                   | 18.5 (2.7)                                                                                                                                                          | 12.1 (6.2)             |
| Completeness (%)                                        | 98.4 (99.0)                                                                                                                                                         | 99.2 (100.0)           |
| Redundancy                                              | 6.5 (6.6)                                                                                                                                                           | 3.6 (3.6)              |
| Wilson B factor (Å <sup>2</sup> )                       | 29.7                                                                                                                                                                | 35.0                   |
| <b>Refinement</b>                                       |                                                                                                                                                                     |                        |
| Resolution (Å)                                          | 30.3-1.80                                                                                                                                                           | 31.1-1.90              |
| No. reflections                                         | 17902                                                                                                                                                               | 32695                  |
| <i>R</i> <sub>work</sub> / <i>R</i> <sub>free</sub> (%) | 18.8/22.5                                                                                                                                                           | 19.0/23.1              |
| No. atoms                                               | 1842                                                                                                                                                                | 3284                   |
| Protein                                                 | 1489                                                                                                                                                                | 2822                   |
| RNA                                                     | 191                                                                                                                                                                 | 282                    |
| Water                                                   | 162                                                                                                                                                                 | 180                    |
| <i>B</i> -factors (Å <sup>2</sup> )                     |                                                                                                                                                                     |                        |
| Protein                                                 | 15.25                                                                                                                                                               | 16.14                  |
| RNA                                                     | 22.97                                                                                                                                                               | 30.04                  |
| Water                                                   | 26.00                                                                                                                                                               | 23.81                  |
| R.m.s. deviations                                       |                                                                                                                                                                     |                        |
| Bond lengths (Å)                                        | 0.010                                                                                                                                                               | 0.012                  |
| Bond angles (°)                                         | 1.5                                                                                                                                                                 | 1.3                    |

\*Values in parentheses are for highest-resolution shell.

**Table S2. Sequence of RNA Oligonucleotides used in the study**

| Name              | Sequence (5' to 3')                  |
|-------------------|--------------------------------------|
| DsrAII            | GGAAUUUUUAAGUGCUUCUUGCUUAAGCAAGUUUCA |
| rpoS-AA           | GGGAACAACAAGAAGUUAAGGCGGGGCAAAAAAUA  |
| rpoS-AC           | AACAACAAG                            |
| A <sub>7</sub>    | AAAAAAA                              |
| AU <sub>6</sub> A | AUUUUUUA                             |

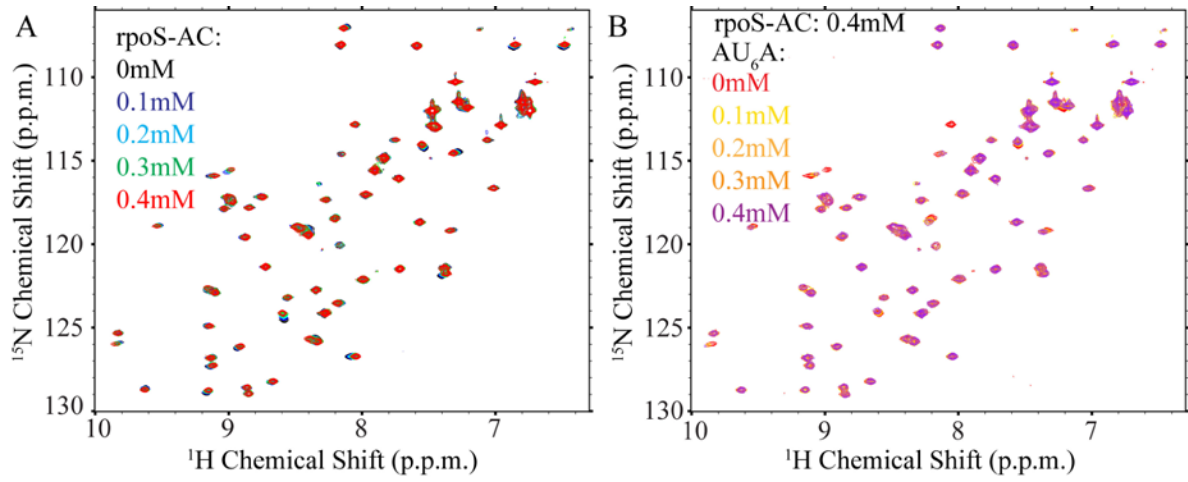

**Figure S1.**  $^1\text{H}$ - $^{15}\text{N}$  spectrum of rpoS-AC followed by AU<sub>6</sub>A titration to Hfq65 R16A/R17A.

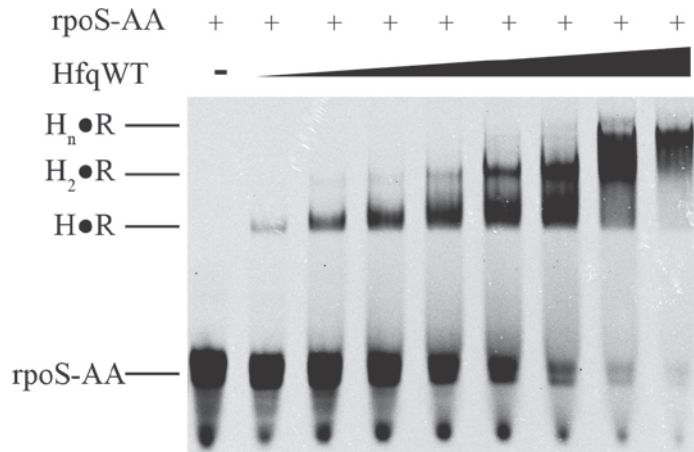

**Figure S2.** EMSA of rpoS-AA by wild-type Hfq.

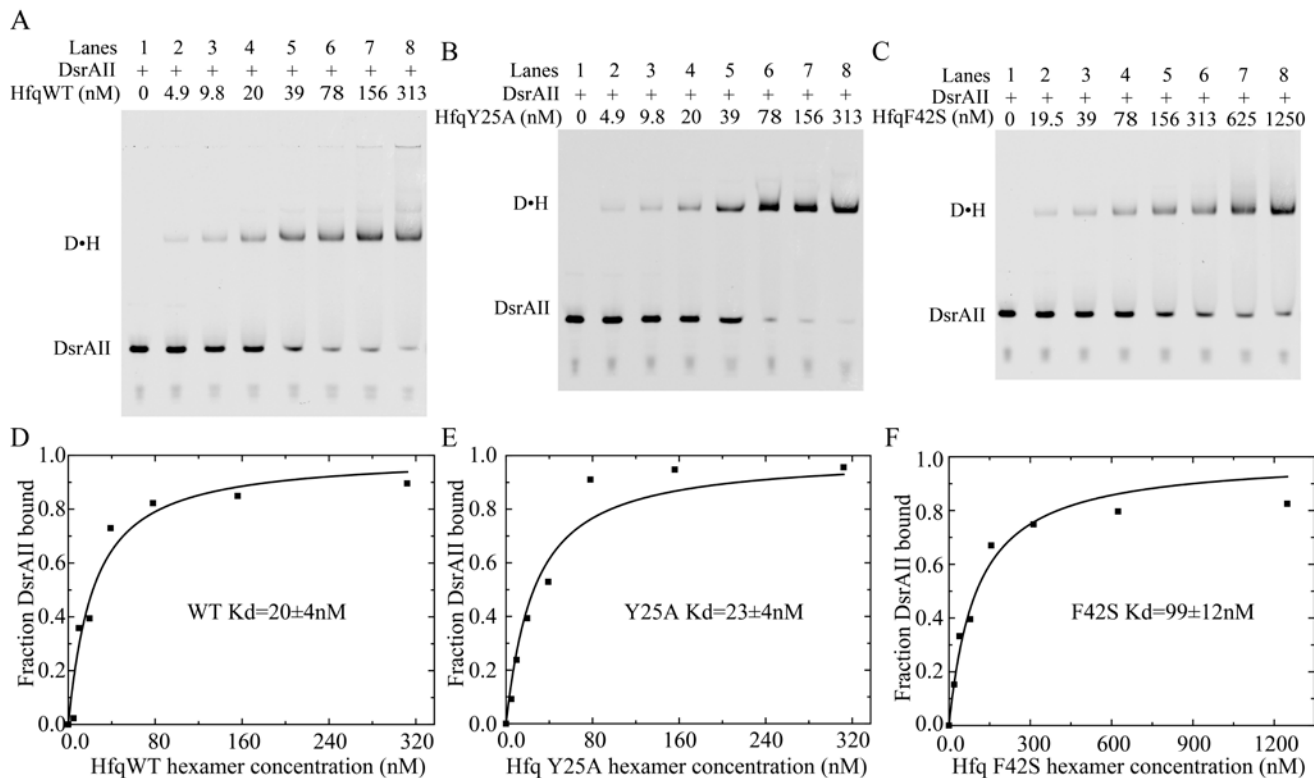

**Figure S3. Binding affinities of DsrAII to HfqWT and mutants estimated from EMSA assays.**

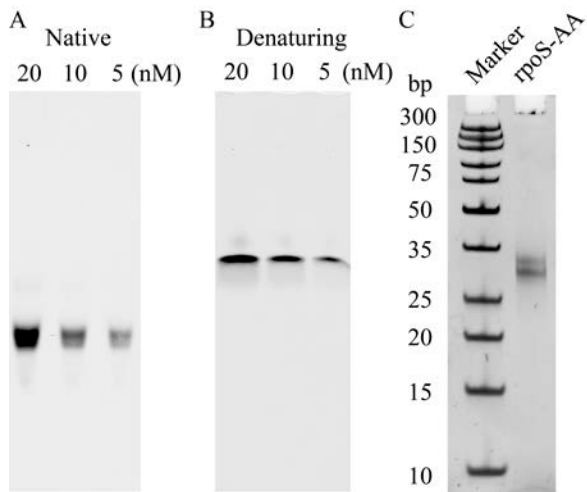

**Figure S4. Different internal structures of rpoS-AA.**

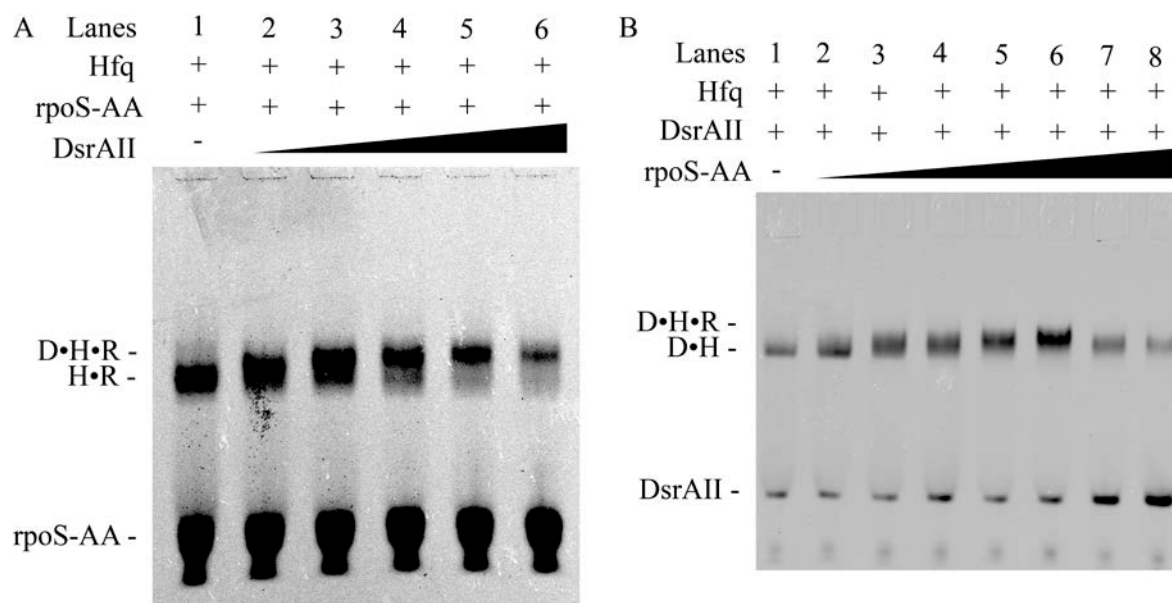

**Figure S5. Full images of ternary complex EMSA.**

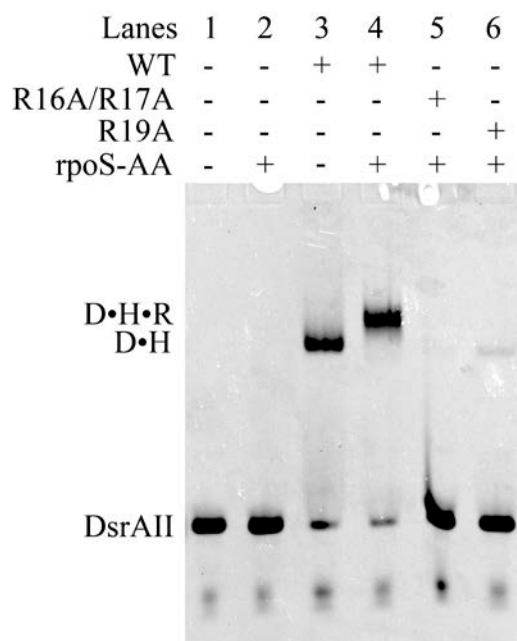

**Figure S6. Lateral side mutations of Hfq abolish ternary complex formation.**

*Supplemental Figure Legends*

**Figure S1.  $^1\text{H}$ - $^{15}\text{N}$  spectrum of rpoS-AC followed by AU<sub>6</sub>A titration to Hfq65 R16A/R17A.** (A) Titration of rpoS-AC into 0.1mM Hfq hexamer at 42°C. (B) AU<sub>6</sub>A titration into sample containing 0.1mM Hfq and 0.4mM rpoS-AC. Spectra are overlaid with color codes presented in the figure.

**Figure S2. EMSA of rpoS-AA by wild-type Hfq.** 10nM labeled rpoS-AA was mixed with 9.8nM, 19.5nM, 39nM, 78nM, 156 nM, 312nM, 625nM and 1250 nM of Hfq hexamers. The mixture was resolved on a 6% native PAGE. With not more than 39nM Hfq, a 1:1 stoichiometry is dominant for Hfq•rpoS-AA complex. At higher Hfq concentrations, higher order complexes may form.

**Figure S3. Binding affinities of DsrAII to Hfq wild type and mutants estimated from EMSA assays.** Fluorescent intensities were integrated from EMSA images (A-C) to calculate bound fraction of labeled DsrAII. These intensities were fitted to 1:1 binding model (D-F). (A) and (D) Full length HfqWT binds to DsrAII at around 20nM Kd. (B) and (E) Hfq Y25A mutant binds to DsrAII with similar Kd (~23nM) as wild type. (C) and (F) F42S mutation increased Kd by ~5 folds, to a value of ~99nM.

**Figure S4. Different internal structures of rpoS-AA.** (A) The fluorescent labeled RNA fragment rpoS-AA ran as double bands on 6% native PAGE. (B) On 6% denaturing only one band was observed. (C) On 15% PAGE stained by Gel-Red, the two bands of rpoS-AA have similar apparent molecular weight.

**Figure S5. Full images of ternary complex EMSA.** (A) Super-shift of Hfq•rpoS-AA complex by DsrAII. Wild type HfqFL was mixed with fluorescent labeled rpoS-AA at final concentrations of 39nM and 10nM respectively. DsrAII concentrations in lanes 1 to 6 are 0nM, 7.8nM, 15.6nM, 31.3nM, 62.5nM and 125nM respectively. (B) Super-shift of Hfq•DsrAII complex by rpoS-AA. Wild type HfqFL was mixed with fluorescent labeled DsrAII at final concentrations of 78nM and 5nM respectively. rpoS-AA concentration in lanes 1 to 8 are 0nM, 7.8nM, 15.6nM, 31.3nM, 62.5nM, 125nM, 250nM and 500nM, respectively.

**Figure S6. Lateral mutations of Hfq abolish ternary complex formation.** Wild type Hfq can bridge DsrAII and rpoS-AA into ternary complex (Lane 4). Mutations of positively charged residues on the outer rim of Hfq to Ala prevented formation of Hfq-RNA complex (Lanes 5 and 6).
